# Supplementary material for: Do Temporal Eating Patterns Differ in Healthy versus Unhealthy Overweight/Obese Individuals?
Source: MDPI journal article supplement (doi:10.3390/nu13114121), 2021-11-17
Supplement: s1 [file s1]

**Supplementary: Table S1** Lifestyle characteristics and dietary intake of MHO and MUO within each gender

| Characteristics                                      | Men (n=173)    |                | P value | Women (n=126)  |                | P value |
|------------------------------------------------------|----------------|----------------|---------|----------------|----------------|---------|
|                                                      | MHO            | MUO            |         | MHO            | MUO            |         |
|                                                      | (n=37)         | (n=42)         |         | (n=136)        | (n=84)         |         |
|                                                      | Mean ± SE      | Mean ± SE      |         | Mean ± SE      | Mean ± SE      |         |
| <b>Sleep traits</b>                                  |                |                |         |                |                |         |
| Sleep duration workdays (hour)                       | 6.1 ± 0.2      | 6.1 ± 0.2      | 0.970   | 6.2 ± 0.1      | 6.3 ± 0.1      | 0.473   |
| Sleep duration free days (hour)                      | 6.2 ± 0.2      | 6.3 ± 0.2      | 0.816   | 6.9 ± 0.1      | 6.7 ± 0.1      | 0.306   |
| MSW (local time)                                     | 02:38 ± 0:42   | 02:38 ± 0:39   | 0.277   | 02:25 ± 0:47   | 02:31 ± 0:41   | 0.398   |
| MSF (local time)                                     | 03:08 ± 0:58   | 03:02 ± 0:59   | 0.453   | 02:49 ± 1:01   | 02:55 ± 0:54   | 0.722   |
| Social jetlag (minute)                               | 28.3 ± 6.1     | 28.4 ± 5.7     | 0.991   | 34.8 ± 3.0     | 26.9 ± 3.8     | 0.110   |
| <b>Physical activity</b>                             |                |                |         |                |                |         |
| MET                                                  | 2869.7 ± 513.9 | 1747.0 ± 480.5 | 0.125   | 1754.9 ± 282.1 | 2851.0 ± 359.7 | 0.020*  |
| <b>Night eating syndrome</b>                         |                |                |         |                |                |         |
| Score                                                | 9.6 ± 0.8      | 10.3 ± 0.7     | 0.565   | 10.4 ± 0.4     | 10.7 ± 0.6     | 0.669   |
| <b>Total dietary intakes</b>                         |                |                |         |                |                |         |
| Energy intake (kcal/day)                             | 2063 ± 89      | 2116 ± 83      | 0.670   | 1730 ± 35      | 1818 ± 45      | 0.128   |
| Energy intake (kcal/kg BW)                           | 23.4 ± 1.1     | 23.3 ± 1.0     | 0.917   | 22.9 ± 0.5     | 23.7 ± 0.6     | 0.293   |
| CHO (g/day)                                          | 256.6 ± 12.9   | 267.7 ± 12.1   | 0.546   | 209.2 ± 4.8    | 219.8 ± 6.2    | 0.189   |
| % E from CHO                                         | 49.6 ± 1.0     | 49.9 ± 0.9     | 0.848   | 48.6 ± 0.6     | 47.8 ± 0.8     | 0.441   |
| Protein (g/day)                                      | 76.5 ± 2.9     | 74.7 ± 2.8     | 0.664   | 66.7 ± 1.4     | 69.4 ± 1.8     | 0.230   |
| % E from protein                                     | 15.0 ± 0.5     | 14.6 ± 0.5     | 0.531   | 15.6 ± 0.2     | 15.4 ± 0.3     | 0.635   |
| Fat (g/day)                                          | 81.2 ± 3.8     | 82.9 ± 3.5     | 0.739   | 69.6 ± 1.8     | 73.5 ± 2.3     | 0.189   |
| % E from fat                                         | 35.4 ± 0.7     | 35.5 ± 0.7     | 0.901   | 35.8 ± 0.5     | 36.2 ± 0.6     | 0.654   |
| <b>Meal timing</b>                                   |                |                |         |                |                |         |
| First mealtime (local time)                          | 08:33 ± 1:14   | 08:05 ± 0:50   | 0.292   | 08:31 ± 0:45   | 08:27 ± 0:46   | 0.375   |
| Last mealtime (local time)                           | 21:02 ± 1:37   | 20:17 ± 1:25   | 0.183   | 20:35 ± 1:29   | 20:27 ± 1:29   | 0.357   |
| Midpoint of eating (local time)                      | 14:48 ± 1:11   | 14:12 ± 0:52   | 0.135   | 14:33 ± 0:51   | 14:25 ± 0:54   | 0.205   |
| Elapse time between last meal and sleep onset (hour) | 2.8 ± 0.3      | 3.4 ± 0.3      | 0.160   | 2.8 ± 0.1      | 3.1 ± 0.2      | 0.262   |
| Total eating window (hour)                           | 12.5 ± 0.3     | 12.2 ± 0.3     | 0.552   | 12.1 ± 0.1     | 12.0 ± 0.2     | 0.745   |

\*Significant  $p < 0.05$  using ANCOVA test adjusted to age, and BMI. Abbreviations: MHO, metabolically healthy obesity; MUO, metabolically unhealthy obesity; SE, standard error; BW, body weight; CHO, carbohydrate; % E, percentage energy; MSW, midpoint of sleep on work days; MSF, midpoint of sleep on free days; MET, metabolic equivalent
